# Supplementary material for: Highly efficient heterogeneous photo-Fenton BiOCl/MIL-100(Fe) nanoscaled hybrid catalysts prepared by green one-step coprecipitation for degradation of organic contaminants
Source: Royal Society of Chemistry journal article supplement (doi:10.1039/d1ra06549a), 2021-01-01
Supplement: d1ra06549a1.pdf [file d1ra06549a1.pdf]

## Supplemental Materials

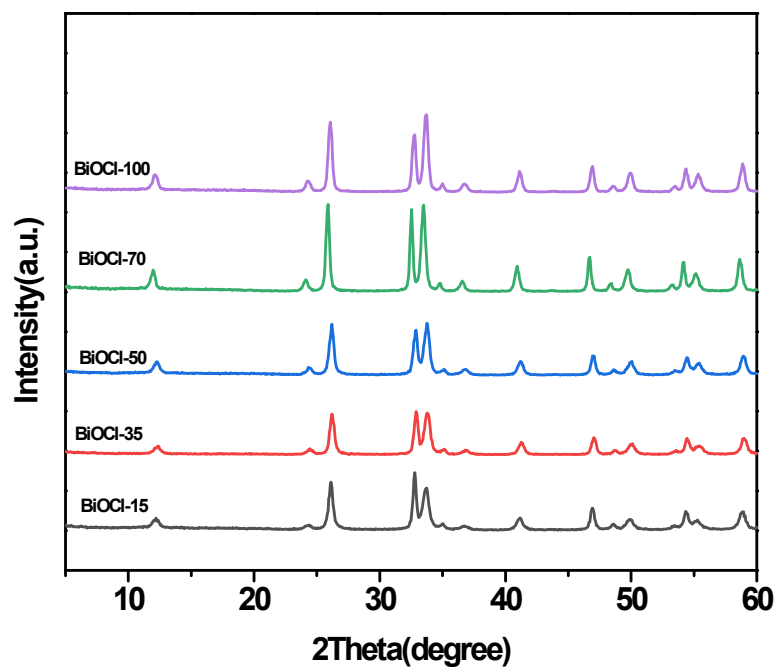

Fig. S1. XRD pattern of BiOCl prepared with existence of H3BTC.

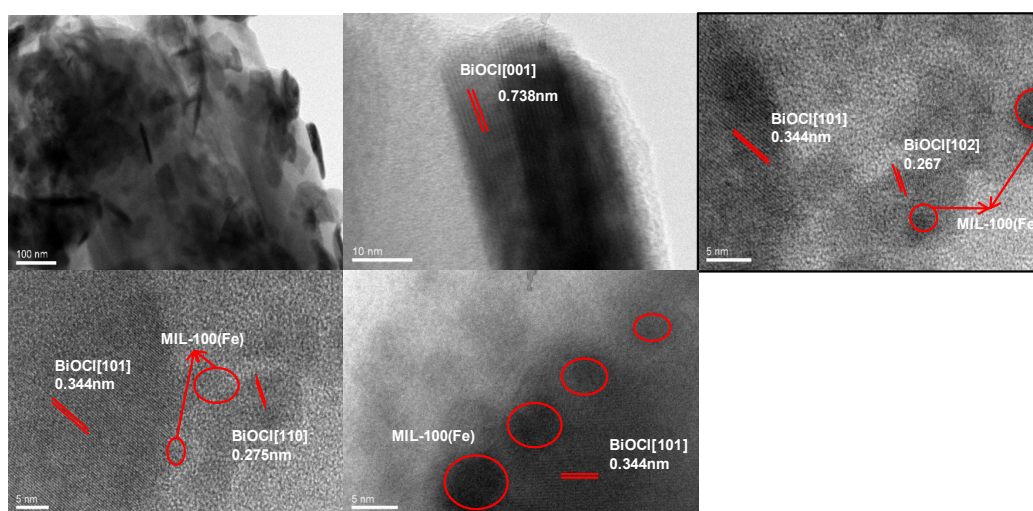

Fig. S2. TEM image of BMF-50.

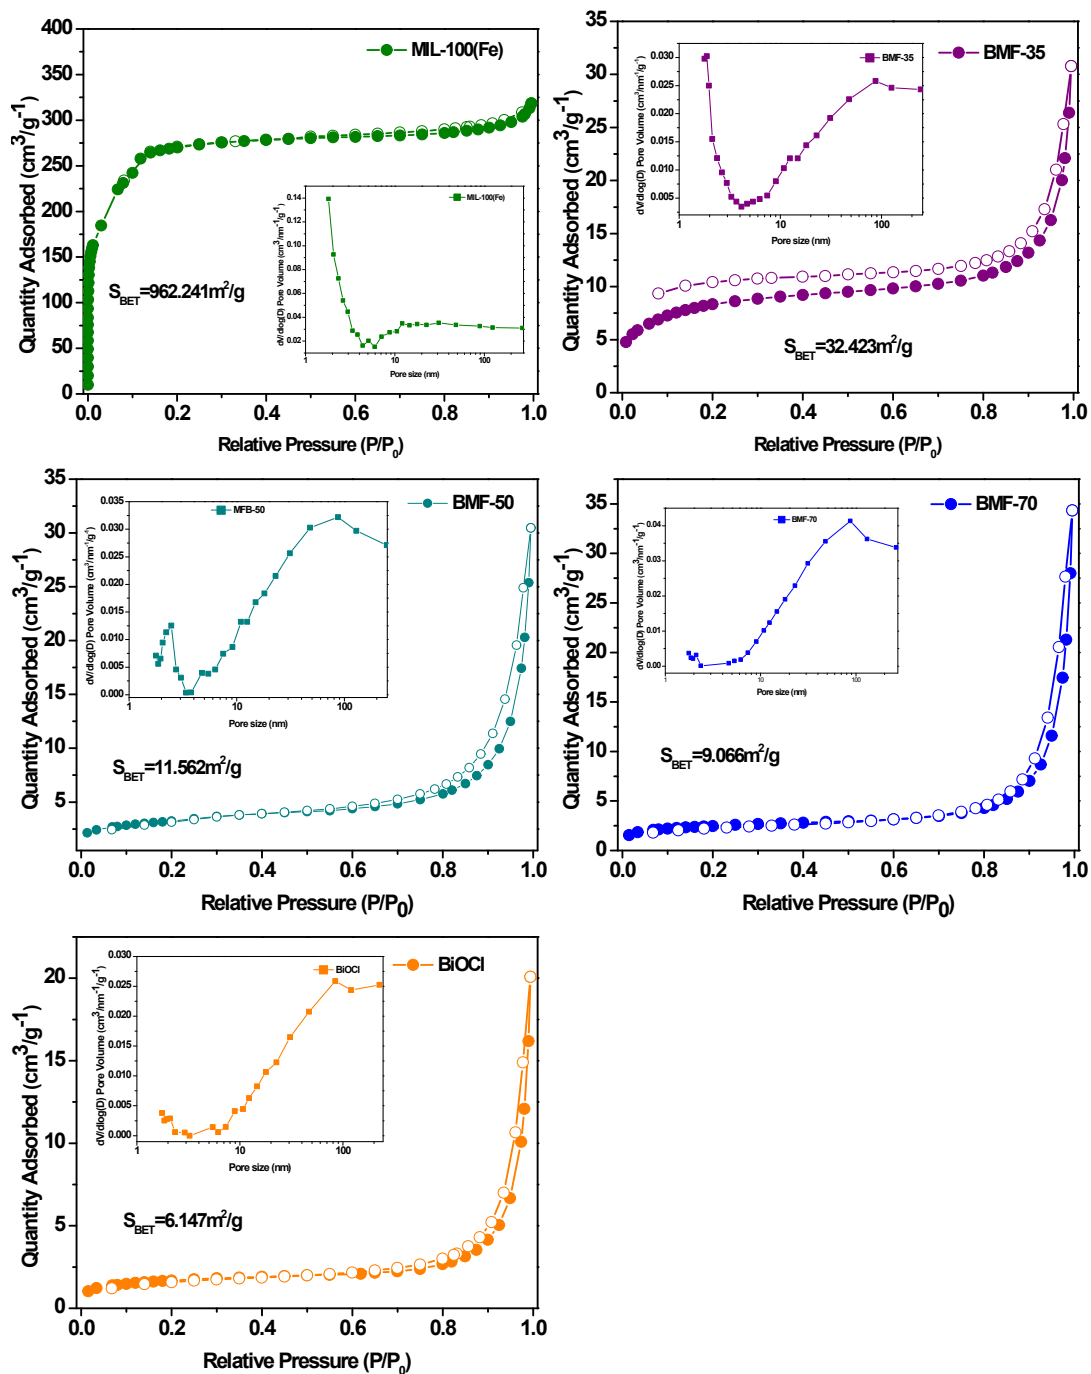

Fig. S3. Nitrogen adsorption-desorption isotherm and the pore size distribution curves for MIL-100(Fe), BMF-35, BMF-50, BMF-70, and BiOCl.

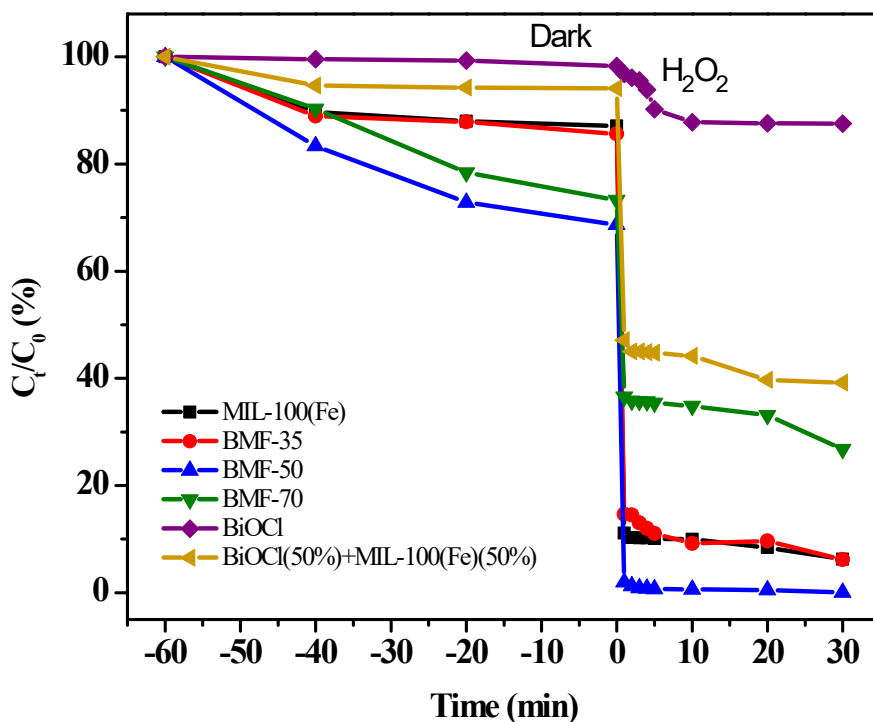

Fig. S4. The adsorption and degradation curves of MB using pure MIL-100(Fe), BiOCl, and BiOCl/MIL-100(Fe) hybrid materials as catalysts. (T = 30°C, [H<sub>2</sub>O<sub>2</sub>]<sub>0</sub> = 7.4 mmol/L, [catalyst] = 600 mg/L, [Dye]<sub>0</sub> = 500 mg/L, pH=4.0)

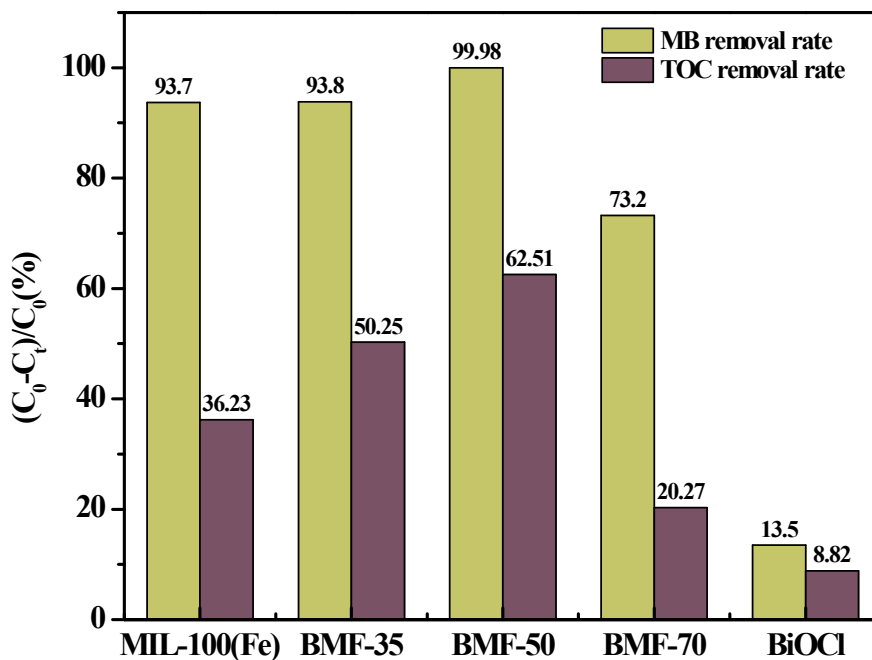

Fig. S5. TOC removal rate of MB with different catalysts after reacting for 30 min.

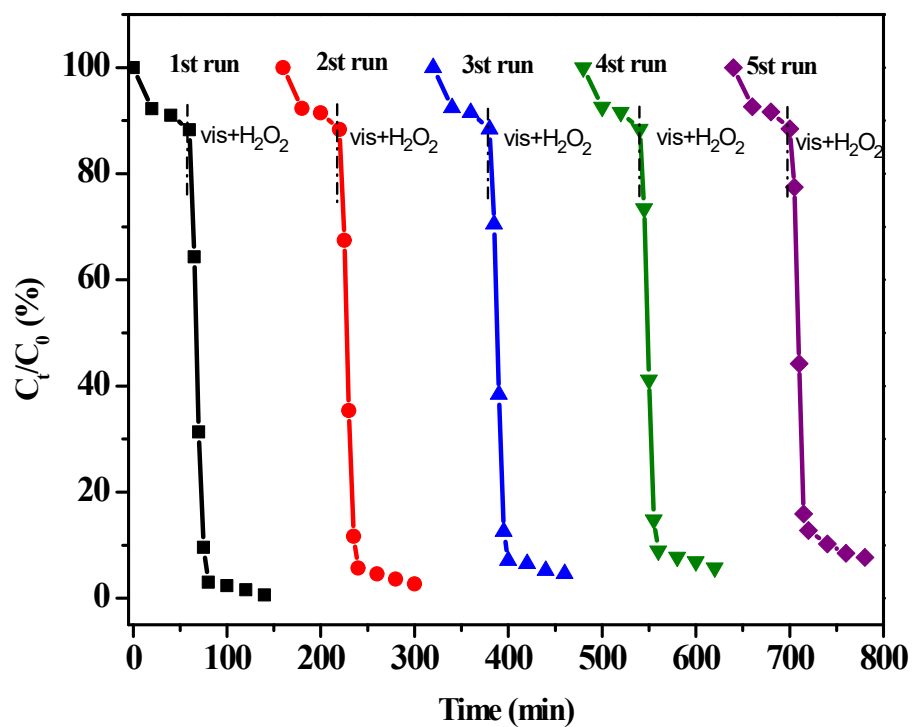

Fig. S6. Reusability of BMF-50 catalyst under the same conditions ( $T = 30^\circ\text{C}$  ( $\text{H}_2\text{O}_2$ )<sub>0</sub> = 7.44 mmol/L, (catalyst) = 80 mg/L,  $[\text{RhB}]_0 = 40$  mg/L)

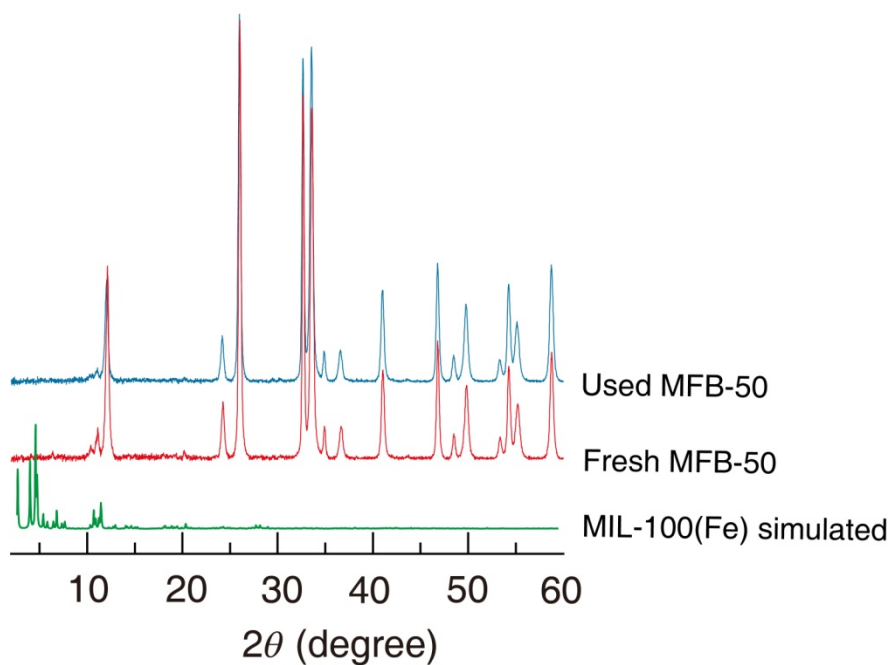

Fig. S7. XRD pattern of BMF-50 (fresh, used).

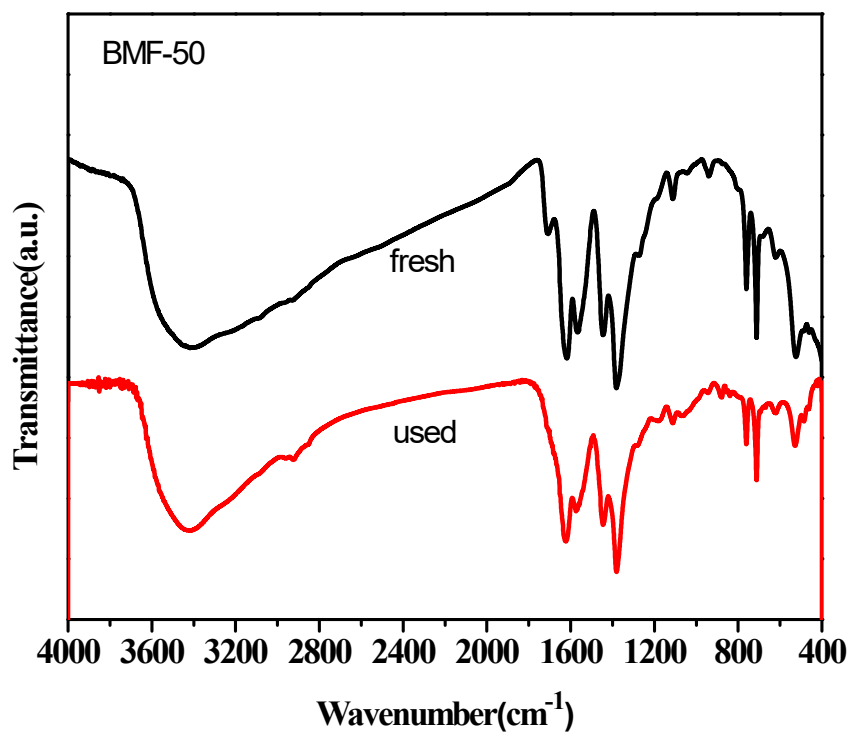

Fig. S8. FT-IR spectra of BMF-50 (fresh, used).

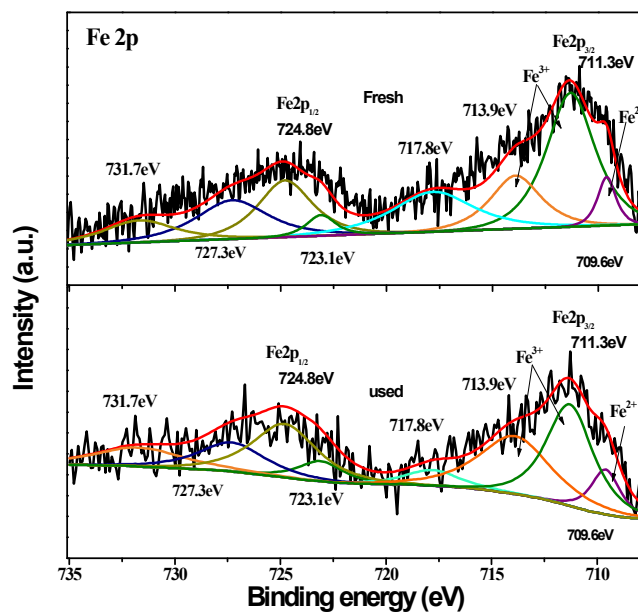

Fig. S9. Fe 2p XPS spectra of BMF-50 (fresh and used).

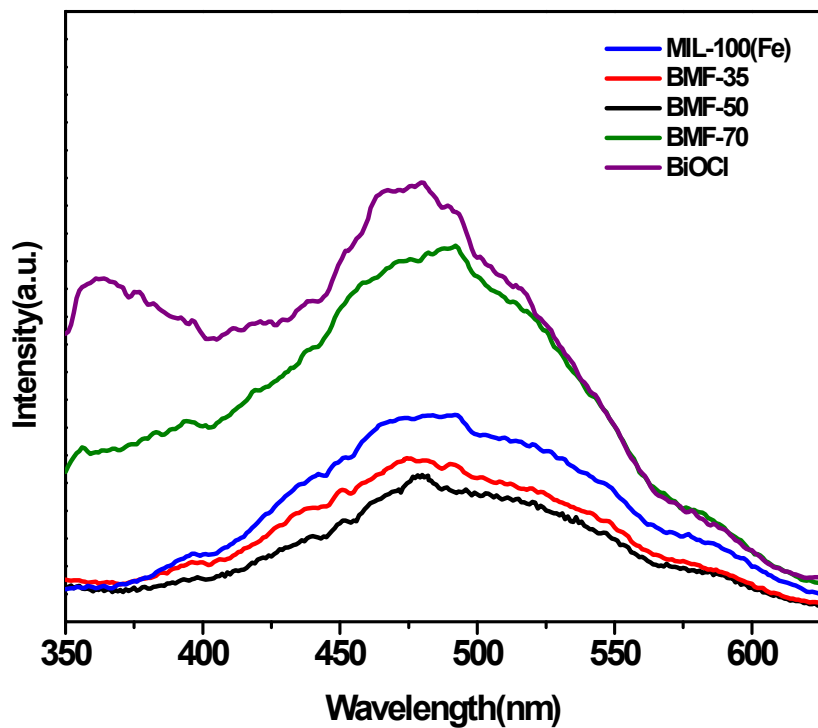

Fig. S10. PL spectra of the different composites.

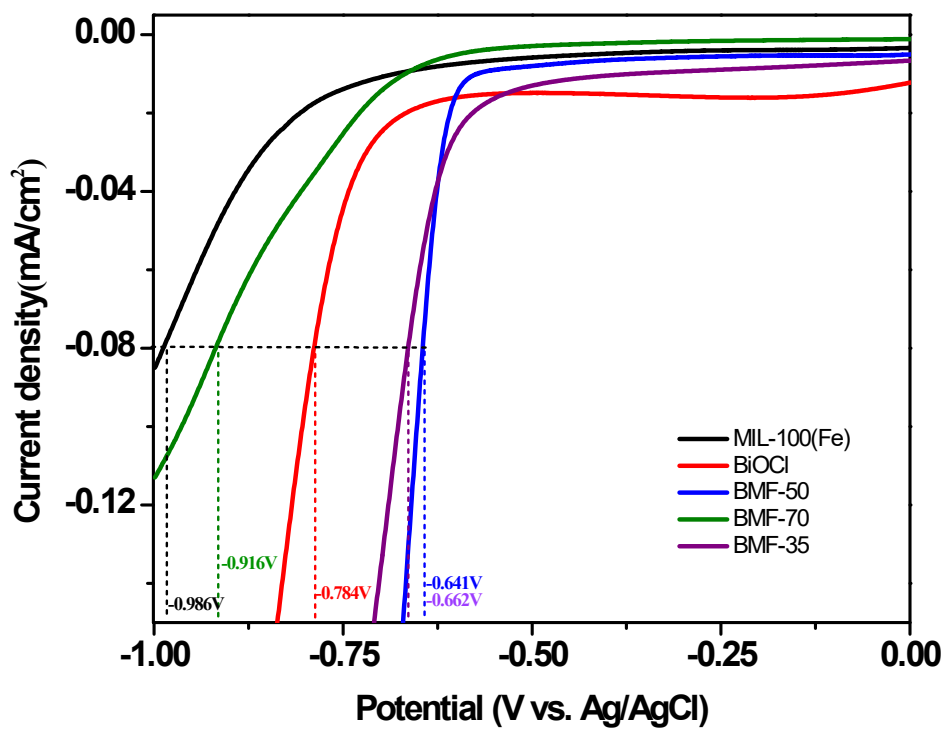

Fig. S11. LSV curves and onset potential of the samples to achieve the current density of  $-0.08 \text{ mA/cm}^2$ .

**Table S1. The types and contents of BMF-(35,50,70) surface acids at different temperatures determined by Py -FTIR spectroscopy.**

| Sample | 50°C    |         | 150°C   |         | 250°C   |         |
|--------|---------|---------|---------|---------|---------|---------|
|        | B       | L       | B       | L       | B       | L       |
| BMF-35 | 0.01623 | 0.06685 | 0.01362 | 0.05057 | 0.00579 | 0.02828 |
| BMF-50 | 0.01747 | 0.04628 | 0.01725 | 0.03000 | 0.01203 | 0.02314 |
| BMF-70 | 0.01668 | 0.01800 | 0.01339 | 0.00686 | 0.01021 | 0.00343 |

Unit: mmol/g

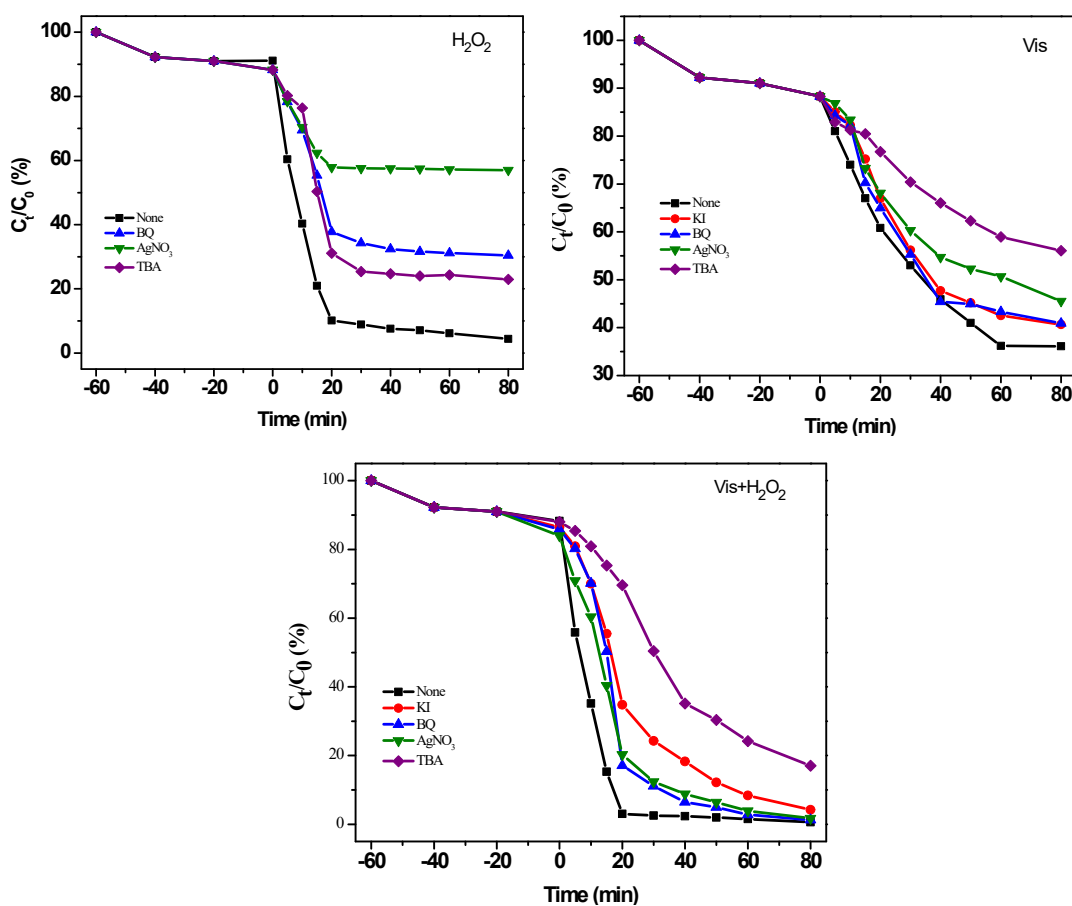

Fig. S12. RhB degradations by BMF-50 under visible light irradiation and H<sub>2</sub>O<sub>2</sub> in the presence of several scavenger.

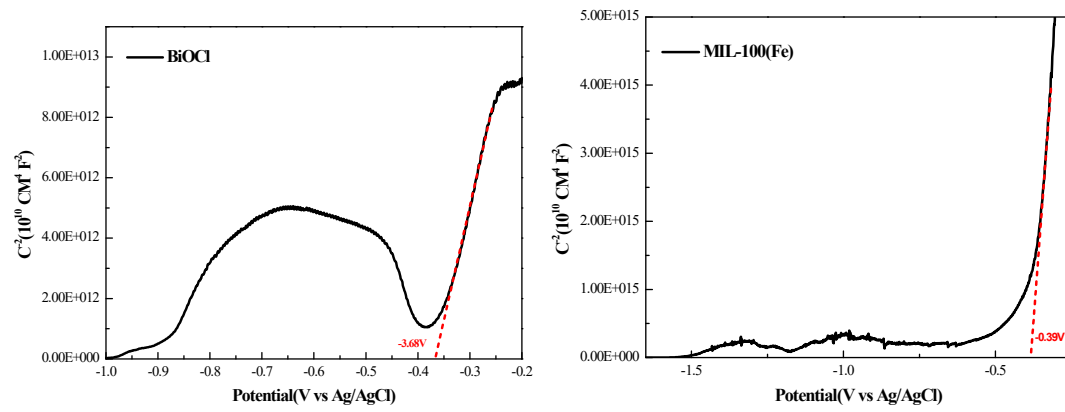

Fig. S13. Mottschotky diagrams of MIL-100(Fe) and BiOCl.
